# Supplementary material for: Could Experimental Inflammation Provide Better Understanding of Migraines?
Source: MDPI journal article supplement (doi:10.3390/cells11152444), 2022-08-06
Supplement: s1 [file s1]

| TG                                                                                                                                                                                                                         |                     |                                                                                                 |
|----------------------------------------------------------------------------------------------------------------------------------------------------------------------------------------------------------------------------|---------------------|-------------------------------------------------------------------------------------------------|
| Pathological changes                                                                                                                                                                                                       | Treatment           | Treatment effective against                                                                     |
| CGRP ↑<br>PACAP-27 ↓<br>PACAP-38 ↓<br>PGE <sub>2</sub> ↑<br>TRPV1 ↑<br>5-HT <sub>7</sub> receptor ↑<br>cAMP ↑<br>PKA ↑<br>ERK <sub>1/2</sub> ↑<br>CREB ↑<br>C-fos ↑<br>Neuronal sensitization<br>Mitochondrial dysfunction | Ketoprofen          | CGRP, PGE <sub>2</sub>                                                                          |
|                                                                                                                                                                                                                            | Nimesulide          | CGRP, PGE <sub>2</sub>                                                                          |
|                                                                                                                                                                                                                            | Etoricoxib          | PGE <sub>2</sub>                                                                                |
|                                                                                                                                                                                                                            | Flunarazine         | CGRP, TRPV1                                                                                     |
|                                                                                                                                                                                                                            | Xiongmatang Extract | CGRP, TRPV1                                                                                     |
|                                                                                                                                                                                                                            | Electro-acupuncture | 5-HT <sub>7</sub> receptor, cAMP, PKA, ERK <sub>1/2</sub> , c-fos, CREB, neuronal sensitization |
|                                                                                                                                                                                                                            | TAK-242             | c-fos                                                                                           |

**Supplementary Table S1: Summary of pathological changes in the TG,** Changes in the TG following IS, and the effect of experimental treatments and their potential associated targets. For detailed references we refer to the text.

## BRAIN/SPINAL CORD

| Pathological changes                                                                                                                                                                                                                                                                                                                                                                                                                                       | Treatment          | Treatment effective against                                     |
|------------------------------------------------------------------------------------------------------------------------------------------------------------------------------------------------------------------------------------------------------------------------------------------------------------------------------------------------------------------------------------------------------------------------------------------------------------|--------------------|-----------------------------------------------------------------|
| CGRP ↑<br>5-HT ↓<br>GABA ↓<br>GABABR1/GABABR2 ↓<br>Glutamate ↑<br>VEGF ↑<br>BDNF ↑<br>nNOS ↑<br>α7nACh receptor ↓<br>JNK ↑<br>CREB ↑<br>IL-18 ↑<br>NF-κB ↑<br>IL-1β ↑<br>TNF-α ↑<br>FKN ↑<br>CX3CR1 ↑<br>MyD88 ↑<br>TRIF ↑<br>IκB ↑<br>Microglia ↑<br>Astrocytes ↑<br>c-Fos ↑<br>Neuronal sensitization<br>Synaptic plasticity ↓<br>Changes in functional connectivity<br>Descending inhibitory pathways ↓<br>BBB permeability ↑↓<br>White matter volume ↑ | Sumatriptan        | VEGF                                                            |
|                                                                                                                                                                                                                                                                                                                                                                                                                                                            | Baclofen           | CGRP, glutamate, PKA, CREB, c-fos, synaptic plasticity          |
|                                                                                                                                                                                                                                                                                                                                                                                                                                                            | H89                | CGRP, glutamate, CREB, c-fos, synaptic plasticity               |
|                                                                                                                                                                                                                                                                                                                                                                                                                                                            | Propranolol        | c-fos, neuronal sensitization                                   |
|                                                                                                                                                                                                                                                                                                                                                                                                                                                            | Amitriptyline      | Synaptic plasticity                                             |
|                                                                                                                                                                                                                                                                                                                                                                                                                                                            | anti-IL18          | IL-18, NF-κB                                                    |
|                                                                                                                                                                                                                                                                                                                                                                                                                                                            | PNU-282987         | CGRP, α7nACh receptor, JNK, IL-18, TNF-α, microglia, astrocytes |
|                                                                                                                                                                                                                                                                                                                                                                                                                                                            | Electroacupuncture | Neuronal sensitization                                          |
|                                                                                                                                                                                                                                                                                                                                                                                                                                                            | TAK-242            | c-fos                                                           |
|                                                                                                                                                                                                                                                                                                                                                                                                                                                            | Wuzhuyu decoction  | c-fos                                                           |

**Supplementary Table S2: Summary of pathological changes in the Brain/Spinal cord,** Changes in the Brain/Spinal cord following IS, and the effect of experimental treatments and their potential associated targets. For detailed references we refer to the text.

| TNC                                                                                                                                                                                                                                                                                                                                                                                                                                                                                                                            |                    |                                                                         |
|--------------------------------------------------------------------------------------------------------------------------------------------------------------------------------------------------------------------------------------------------------------------------------------------------------------------------------------------------------------------------------------------------------------------------------------------------------------------------------------------------------------------------------|--------------------|-------------------------------------------------------------------------|
| Pathological changes                                                                                                                                                                                                                                                                                                                                                                                                                                                                                                           | Treatment          | Treatment effective against                                             |
| CGRP ↑<br>Substance P ↑<br>NO ↑<br>BDNF ↑<br>NGF ↑<br>5-HT <sub>7</sub> receptor ↓<br>mGluR5 ↑<br>P2X <sub>4</sub> receptor ↑<br>P2Y <sub>14</sub> receptor ↑<br>ASIC3 ↑<br>TNF-α ↑<br>IL-1β ↑<br>FKN ↑<br>CX3CR1 ↑<br>Microglia ↑<br>C-fos ↑<br>Neuronal sensitization<br>cAMP ↑<br>PKA ↑<br>ERK <sub>1/2</sub> ↑<br>PKC ↑<br>p38 ↑<br>EAAT3 ↑<br>TrKB ↑<br>CREB ↑<br>Synaptic plasticity ↑<br>EphB2/EphrinB2 ↑<br>CaMKII ↑<br>Mitochondrial dysfunction<br>SIRT1 ↓<br>PGC-1α ↓<br>mTOR ↑<br>Autophagy<br>BBB permeability ↑↓ | Sumatriptan        | CGRP, 5-HT, TNF-α, IL-1β, c-fos                                         |
|                                                                                                                                                                                                                                                                                                                                                                                                                                                                                                                                | anti-NGF           | CGRP, ASIC3, PKC, c-fos                                                 |
|                                                                                                                                                                                                                                                                                                                                                                                                                                                                                                                                | Chelerythrin       | CGRP, ASIC3, c-fos                                                      |
|                                                                                                                                                                                                                                                                                                                                                                                                                                                                                                                                | APETx2             | CGRP, c-fos                                                             |
|                                                                                                                                                                                                                                                                                                                                                                                                                                                                                                                                | MPEP               | CGRP, Substance P, mTOR, autophagy                                      |
|                                                                                                                                                                                                                                                                                                                                                                                                                                                                                                                                | Rapamycin          | CGRP, Substance P, IL-1β, autophagy                                     |
|                                                                                                                                                                                                                                                                                                                                                                                                                                                                                                                                | Minocycline        | IL-1β, TNF-α, microglia                                                 |
|                                                                                                                                                                                                                                                                                                                                                                                                                                                                                                                                | Electroacupuncture | 5-HT <sub>7</sub> receptor, cAMP, PKA, ERK <sub>1/2</sub> , CREB, c-fos |
|                                                                                                                                                                                                                                                                                                                                                                                                                                                                                                                                | EphB1-Fc           | CGRP, Substance P, synaptic plasticity                                  |
|                                                                                                                                                                                                                                                                                                                                                                                                                                                                                                                                | TAK-242            | c-fos                                                                   |
|                                                                                                                                                                                                                                                                                                                                                                                                                                                                                                                                | PP2                | CGRP, Substance P, synaptic plasticity                                  |
|                                                                                                                                                                                                                                                                                                                                                                                                                                                                                                                                | Genistein          | CGRP, Substance P, synaptic plasticity                                  |
|                                                                                                                                                                                                                                                                                                                                                                                                                                                                                                                                | ANA-12             | CGRP, EAAT3, c-fos                                                      |
|                                                                                                                                                                                                                                                                                                                                                                                                                                                                                                                                | TNP-ATP            | CGRP, BDNF, P2X <sub>4</sub> receptor, EAAT3, p38, c-fos                |
|                                                                                                                                                                                                                                                                                                                                                                                                                                                                                                                                | SIRT1720           | CGRP, Substance P, SIRT1, PGC-1α, mitochondrial dysfunction             |
|                                                                                                                                                                                                                                                                                                                                                                                                                                                                                                                                | Wuzhuyu Decoction  | CGRP, TNF-α, IL-1β, c-fos                                               |

**Supplementary Table S3: Summary of pathological changes in the TNC**, Changes in the TNC following IS, and the effect of experimental treatments and their potential associated targets. For detailed references we refer to the text.
